# Supplementary material for: Transcriptome and Proteome Profiling of Different Colored Rice Reveals Physiological Dynamics Involved in the Flavonoid Pathway
Source: MDPI journal article supplement (doi:10.3390/ijms20102463), 2019-05-18
Supplement: s1 [file s1]

**Additional file 2:** Overview of transcriptome quality for the caryopses of the three rice cultivars and the pericarp and endosperm of black rice

| Sample | Raw data | Clean data | Clean data ratio (%) | Aligned to genome | Mapping rate | Aligned to genes | Mapping rate | Expressed genes |
|--------|----------|------------|----------------------|-------------------|--------------|------------------|--------------|-----------------|
| B1-C   | 85875736 | 85420978   | 99.47                | 64702084          | 75.74%       | 62124682         | 72.73%       | 24762           |
| B2-C   | 89091764 | 88498874   | 99.33                | 70522606          | 79.69%       | 64097704         | 72.43%       | 26303           |
| R1-C   | 48246808 | 47874208   | 99.23                | 39091760          | 81.66%       | 34546578         | 72.16%       | 28104           |
| R2-C   | 52317468 | 51873894   | 99.15                | 42023386          | 81.01%       | 36400264         | 70.17%       | 27208           |
| W1-C   | 74381316 | 73901080   | 99.35                | 57071864          | 77.23%       | 52674924         | 71.28%       | 26816           |
| W2-C   | 76523966 | 76125992   | 99.48                | 58727922          | 77.15%       | 54582540         | 71.70%       | 26975           |
| B1-P   | 54674886 | 54366040   | 99.44                | 45308612          | 83.34%       | 40068992         | 73.70%       | 26731           |
| B2-P   | 51549756 | 51241628   | 99.4                 | 42536220          | 83.01%       | 37600336         | 73.38%       | 27004           |
| B1-E   | 59018010 | 58584246   | 99.27                | 48564688          | 82.90%       | 44416134         | 75.82%       | 25448           |
| B2-E   | 64909934 | 64469952   | 99.32                | 53982328          | 83.73%       | 49165754         | 76.26%       | 25554           |
