# Supplementary material for: Transcriptome and Proteome Profiling of Different Colored Rice Reveals Physiological Dynamics Involved in the Flavonoid Pathway
Source: MDPI journal article supplement (doi:10.3390/ijms20102463), 2019-05-18
Supplement: s1 [file s1]

**Additional file 13:** List of RT-PCR primers for flavonoid biosynthesis pathway genes

| Gene         | Primer-F                | Primer-R              | Product size |
|--------------|-------------------------|-----------------------|--------------|
| GAPDH        | AAGCCAGCATCCTATGATCAGAT | CGTAACCCAGAATACCCTTG  | 144          |
| Os04g0103900 | CACATGTCGGACGAGTTCCT    | GAGATTCTGGCGGACGTTGA  | 41           |
| Os03g0289800 | CATCGGCGACCAGATACAGG    | TCCGCGGGTTGTAGAAGAAG  | 77           |
| Os04g0630400 | ACTTGAGGATGAAGGCAGC     | TGTGGCTCTTGTCGTACACC  | 51           |
| Os03g0367101 | CAACATCAGCGACTTCGTGC    | TGGTGATGAGGACGTCGAAC  | 61           |
| Os03g0184550 | GAGGTTCAATGGGCGTTTA     | TTTCACCTTCTCTGCCTTTC  | 83           |
| Os11g0116300 | GGTGATCAAGGAGATCAAAGG   | CATCCTCCTCGTACTTGTCTA | 54           |
| Os01g0372500 | GAGTGGGAGGACTACCTGTTC   | ATGGCGAGCAGCTTGGAT    | 108          |
| Os10g0536400 | TATCCTCTCCACCAGTTTCG    | CCTGAACCCTAGCTCTCTTA  | 64           |
| Os04g0630300 | AAATACCCGCACCACAAC      | CATGAACTCGAACCCTTCAC  | 73           |
| Os04g0630600 | GCTGTTGGAGAAGGGATATG    | AGTCCTTGAGATGGGAGTT   | 42           |
| Os04g0630800 | CGACTACCTGAGAACAGAGA    | GGCTCATGTTGTTCTCCTC   | 65           |
| Os07g0601000 | CATCGAGATCAGGCTCAAAG    | CTCCACTCCATACCTGTACT  | 64           |
| Os06g0651100 | CTCGACCTCCTCAAAGAAAC    | TCCAGTATCTCCTCCATTCC  | 68           |
| Os01g0832600 | CATCTCGCTCGCACTCTTCT    | CGAAGGTCATCGGACGGTAG  | 71           |
| Os04g0630900 | GGGCTGATGAAAATGACGGC    | AGACACCATACGCCTGCAAA  | 41           |
| Os07g0598000 | TGAGGGTGGGAGCTGATACA    | TCCCATTCTCTTGGCGCATT  | 68           |
| Os02g0767300 | ATCAACTTCTACCCGCCGTG    | GTACCAGTGGCCATCCTTGA  | 96           |
| Os06g0683100 | CAGCTCCTCCTCTCACCAAT    | AAGGAGGGTAGTGCAAGGA   | 183          |
| Os03g0184600 | GCACCCCTATTCCATGTACCT   | AGTTTCTTGGAAGTGTAGCCC | 140          |
| Os11g0566800 | GCTACAACGAGGCATTCTGG    | CCGACCTCCTCTTCATCTCC  | 141          |
| Os03g0819600 | GTGTGAGGGGAGTGGAGATC    | CGTCACCTTGTCGAGTACT   | 197          |
| Os12g0115700 | TCACCGTCAGTAAGCCGTTA    | ACAAGCTCCTCTGCCTTCTT  | 121          |
| Os04g0667200 | GAAGTAAGGGTGGTGGCTCT    | TGTGCTGCCAGACCTATTGA  | 125          |
| Os08g0480200 | CGGCGATCAGTTGGAGATTG    | CCGTCTTCTCGTTGATGCTG  | 197          |
| Os06g0162500 | ACAGCGACAGCATGAAAG      | GTTGTGGGCAAGGAGAATA   | 107          |
| Os04g0630100 | CGACAGTCAGAAACCCCGAA    | CGACGAGGAAGGCGTAATC   | 110          |
| Os06g0626700 | CTGGGTCGTCTTCTGCGAG     | TTGCACGTGCTGCTTGAATG  | 83           |
